# Supplementary material for: Strain engineering the electronic and photocatalytic properties of WS2/blue phosphene van der Waals heterostructures
Source: Royal Society of Chemistry journal article supplement (doi:10.1039/d0cy01656j), 2020-10-27
Supplement: d0cy01656j1.pdf [file d0cy01656j1.pdf]

*Supporting Information*

**Strain engineering the electronic and photocatalytic properties of  
WS<sub>2</sub>/blue phosphene van der Waals heterostructure**

Jingnan Wang<sup>1</sup>, Yuhong Huang<sup>1, \*</sup>, Fei Ma<sup>2, \*</sup>, Jianmin Zhang<sup>1</sup>, Xiumei Wei<sup>1</sup>, Jing Liu<sup>3</sup>

<sup>1</sup> *School of Physics & Information Technology, Shaanxi Normal University, Xi'an 710119, Shaanxi, China*

<sup>2</sup> *State Key Laboratory for Mechanical Behavior of Materials, Xi'an Jiaotong University, Xi'an 710049, Shaanxi, China*

<sup>3</sup> *Department of Basic Sciences, Air Force Engineering University, Xi'an 710051, Shaanxi, China*

\*Corresponding authors. Tel.: +86 29 81530750, E-mail: huangyh@snnu.edu.cn (Y.H. Huang),

+86 29 82668610, E-mail: mafei@mail.xjtu.edu.cn (F. Ma).

## 1. Influences of the calculation parameters during geometric optimization

We have investigated the influences of calculation parameters on the geometric optimization of different stacking structures. The energy cutoff and convergence tolerance of 400eV, 500 eV and  $1 \times 10^{-4}$  eV,  $1 \times 10^{-5}$  eV are successively tested. By these settings, we focus on the variations of bond lengths (W-S, P-P), the layer thickness (WS<sub>2</sub>, BlueP) and the minimum distance (d) of four structures corresponding to Model I, II, III and IV. The results are listed in Table S1~4 and the standard errors of the mean

( $s_{\bar{x}} = \sqrt{\frac{\sum_{i=1}^n (x_i - \bar{x})^2}{n(n-1)}}$ ) of each physical quantity with different calculation parameters are calculated. It can be seen that the W-S and P-P bond lengths, WS<sub>2</sub> and BlueP layer thickness, as well as the minimum interfacial distance change little with different cutoff energy and convergence tolerance. The values of  $s_{\bar{x}}$  are less than 0.008, which indicates the results obtained through the parameters with lower precision are accurate.

Meanwhile, the total energies (E) of each configuration calculated with different parameters are almost maintained, and the standard errors of the mean is only 0.023. Furthermore, the band structures of the most stable heterostructure (Model III) are calculated with different cutoff energy and convergence tolerance, which are depicted in Fig. S1. For comparison, the valence band maximum (VBM), conduction band minimum (CBM) and band gap (E<sub>g</sub>) of WS<sub>2</sub>/BlueP are calculated and listed in Table S5. The standard errors of the mean of VBM, CBM and E<sub>g</sub> are 0.000178, 0.000545 and 0.000723, respectively, indicating the little discrepancy between results obtained via different calculating parameters.

Therefore, WS<sub>2</sub>/BlueP is insensitive to the energy cutoff and energy convergence criteria. Considering the computational cost, the cutoff energy and convergence

tolerance of 400eV and  $1 \times 10^{-4}$  eV can be considered reasonable.

Table S1 Geometrical parameters and total energies of WS<sub>2</sub>/BlueP heterostructure (Model I).

| Model I               | cutoff energy (eV), convergence tolerance (eV) |                         |                         |                         |                         |
|-----------------------|------------------------------------------------|-------------------------|-------------------------|-------------------------|-------------------------|
|                       | 400, $1 \times 10^{-4}$                        | 400, $1 \times 10^{-5}$ | 500, $1 \times 10^{-4}$ | 500, $1 \times 10^{-5}$ | $S_{\bar{x}} (10^{-3})$ |
| W-S length (Å)        | 2.432, 2.431                                   | 2.432, 2.431            | 2.433                   | 2.433, 2.434            | 0.364                   |
| WS2 thickness (Å)     | 3.120                                          | 3.121                   | 3.123                   | 3.125                   | 1.109                   |
| P-P length(Å)         | 2.249                                          | 2.250, 2.249            | 2.250, 2.249            | 2.249                   | 0.211                   |
| BlueP<br>thickness(Å) | 1.264                                          | 1.263                   | 1.257                   | 1.259                   | 1.652                   |
| d(Å)                  | 3.315                                          | 3.337                   | 3.353                   | 3.328                   | 7.983                   |
| E(eV)                 | -294.827                                       | -294.827                | -294.904                | -294.904                | 22.228                  |

Table S2 Geometrical parameters and total energies of WS<sub>2</sub>/BlueP heterostructure (Model II).

| Model II           | cutoff energy (eV), convergence tolerance (eV) |                         |                         |                         |                         |
|--------------------|------------------------------------------------|-------------------------|-------------------------|-------------------------|-------------------------|
|                    | 400, $1 \times 10^{-4}$                        | 400, $1 \times 10^{-5}$ | 500, $1 \times 10^{-4}$ | 500, $1 \times 10^{-5}$ | $S_{\bar{x}} (10^{-3})$ |
| W-S length (Å)     | 2.432~2.43<br>4                                | 2.431~2.434             | 2.432~2.434             | 2.432~2.434             | 0.274                   |
| WS2 thickness (Å)  | 3.123                                          | 3.124                   | 3.123                   | 3.123                   | 0.250                   |
| P-P length(Å)      | 2.250                                          | 2.250, 2.249            | 2.250, 2.249            | 2.250, 2.249            | 0.202                   |
| BlueP thickness(Å) | 1.258                                          | 1.258                   | 1.257                   | 1.257                   | 0.289                   |
| d(Å)               | 3.593                                          | 3.592                   | 3.593                   | 3.593                   | 0.250                   |
| E(eV)              | -294.625                                       | -294.624                | -294.715                | -294.714                | 25.982                  |



Table S3 Geometrical parameters and total energies of WS<sub>2</sub>/BlueP heterostructure (Model III).

| Model III             | cutoff energy (eV), convergence tolerance (eV) |                         |                         |                         | $\mathcal{S}_{\bar{x}}$ ( $10^{-3}$ ) |
|-----------------------|------------------------------------------------|-------------------------|-------------------------|-------------------------|---------------------------------------|
|                       | 400, $1 \times 10^{-4}$                        | 400, $1 \times 10^{-5}$ | 500, $1 \times 10^{-4}$ | 500, $1 \times 10^{-5}$ |                                       |
| W-S length (Å)        | 2.432~2.434                                    | 2.432~2.434             | 2.433~2.435             | 2.432~2.434             | 0.251                                 |
| WS2 thickness (Å)     | 3.124                                          | 3.125                   | 3.127                   | 3.124                   | 0.707                                 |
| P-P length(Å)         | 2.250, 2.249                                   | 2.250, 2.249            | 2.250, 2.249            | 2.248~2.250             | 0.171                                 |
| BlueP<br>thickness(Å) | 1.263                                          | 1.262                   | 1.260                   | 1.267                   | 1.472                                 |
| d(Å)                  | 3.237                                          | 3.226                   | 3.266                   | 3.167                   | 20.789                                |
| E(eV)                 | -294.990                                       | -294.990                | -295.060                | -295.077                | 22.925                                |

Table S4 Geometrical parameters and total energies of WS<sub>2</sub>/BlueP heterostructure (Model IV).

| Model IV           | cutoff energy (eV), convergence tolerance (eV) |                         |                         |                         | $\mathcal{S}_{\bar{x}}$ ( $10^{-3}$ ) |
|--------------------|------------------------------------------------|-------------------------|-------------------------|-------------------------|---------------------------------------|
|                    | 400, $1 \times 10^{-4}$                        | 400, $1 \times 10^{-5}$ | 500, $1 \times 10^{-4}$ | 500, $1 \times 10^{-5}$ |                                       |
| W-S length (Å)     | 2.431~2.434                                    | 2.432~2.434             | 2.432, 2.433            | 2.432~2.434             | 0.227                                 |
| WS2 thickness (Å)  | 3.123                                          | 3.123                   | 3.124                   | 3.127                   | 0.947                                 |
| P-P length(Å)      | 2.250, 2.249                                   | 2.250, 2.249            | 2.250, 2.249            | 2.250, 2.249            | 0.177                                 |
| BlueP thickness(Å) | 1.259                                          | 1.259                   | 1.260                   | 1.260                   | 0.289                                 |
| d(Å)               | 3.707                                          | 3.706                   | 3.749                   | 3.744                   | 11.594                                |
| E(eV)              | -294.479                                       | -294.479                | -294.568                | -294.569                | 25.837                                |

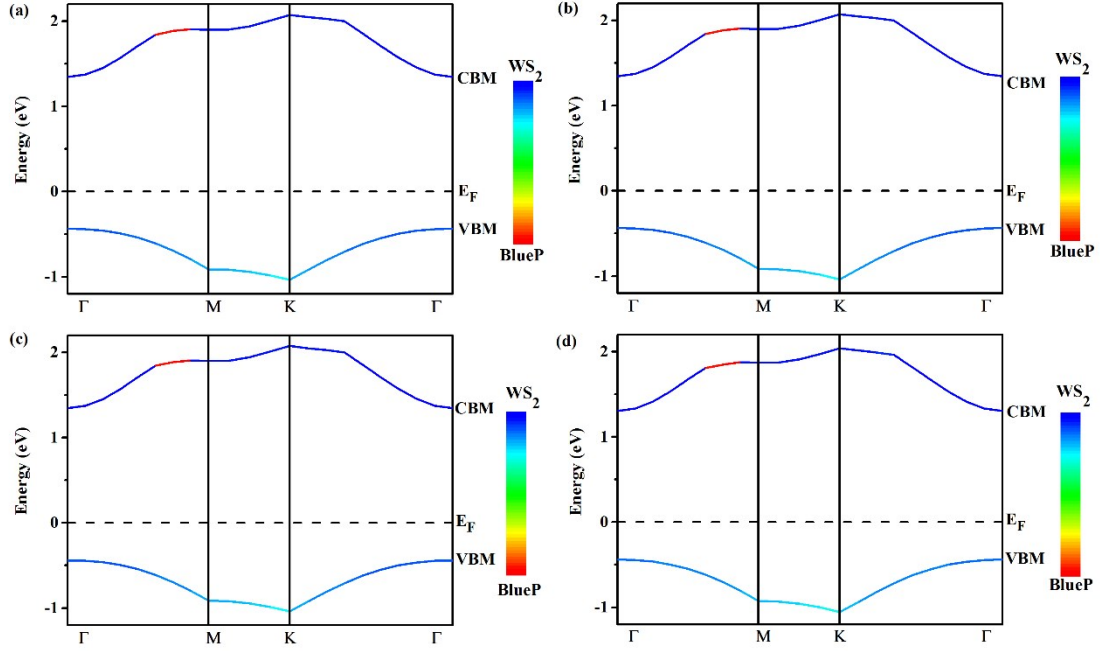

Fig. S1 The band structures of WS<sub>2</sub>/BlueP calculating with different energy cutoff and convergence criteria: (a) 400 and  $1 \times 10^{-4}$ , (b) 400 and  $1 \times 10^{-5}$ , (c) 500 and  $1 \times 10^{-4}$ , (d) 500 and  $1 \times 10^{-5}$ . The unit is eV and the Fermi level is set to be zero.

Table S5 The VBM, CBM and band gap of the most stable configuration of WS<sub>2</sub>/BlueP.

| Model III | cutoff energy (eV), convergence tolerance (eV) |                         |                         |                         | $S_{\bar{x}}$ ( $10^{-3}$ ) |
|-----------|------------------------------------------------|-------------------------|-------------------------|-------------------------|-----------------------------|
|           | 400, $1 \times 10^{-4}$                        | 400, $1 \times 10^{-5}$ | 500, $1 \times 10^{-4}$ | 500, $1 \times 10^{-5}$ |                             |
| VBM (eV)  | -0.435                                         | -0.439                  | -0.435                  | -0.439                  | 0.178                       |
| CBM (eV)  | 1.344                                          | 1.345                   | 1.344                   | 1.306                   | 0.545                       |
| Eg (eV)   | 1.779                                          | 1.784                   | 1.779                   | 1.745                   | 0.723                       |

## 2. Influences of different k-point meshes on the absorption

We have tested the influence of different k-point meshes on the absorption spectrum of the heterostructure. For comparison, the k-point meshes of  $2 \times 2 \times 1$ ,  $3 \times 3 \times 1$ ,  $4 \times 4 \times 1$ ,  $6 \times 6 \times 1$ ,  $8 \times 8 \times 1$  and  $15 \times 15 \times 1$  are adopted during the computation of optical

properties. The absorption spectra are depicted in Fig. S2. It can be clearly seen that the absorption spectra have converged very well as the k-point reaches  $8\times 8\times 1$ . We predict that the absorption spectra will be maintained as the k-point increases to  $30\times 30\times 1$ . In view of the computational cost, the  $8\times 8\times 1$  k-point mesh is employed during the investigation of absorption spectra in the paper.

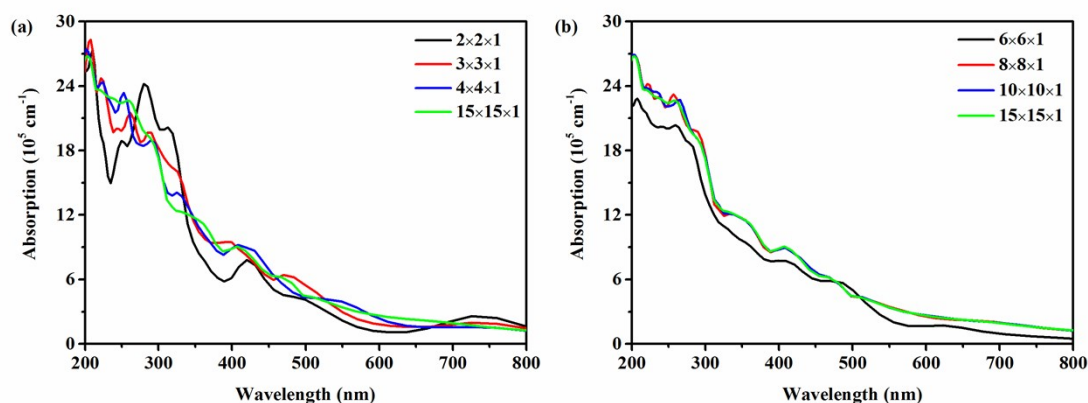

Fig. S2 The absorption spectra of WS<sub>2</sub>/BlueP heterostructures calculated via different k-point mesh.

### 3. Molecular dynamics simulations

We have performed the ab-initio molecular dynamics (AIMD) at room temperature (300K) to evaluate the thermal stability of the WS<sub>2</sub>/BlueP heterostructure, since the photocatalytic reactions usually occur at room temperature. The ideal, -4% uniaxial and -6% biaxial strained heterostructures are chosen to perform the AIMD calculations. The time-step is chosen as 1 fs, and 5000 steps are executed. Fig. 3 displays the variation of the free energy and temperature with the simulation time. Obviously, the fluctuation of the free energy are all relatively small during the AIMD simulation, demonstrating the ideal and strained WS<sub>2</sub>/BlueP heterostructures are thermally stable at 300 K.

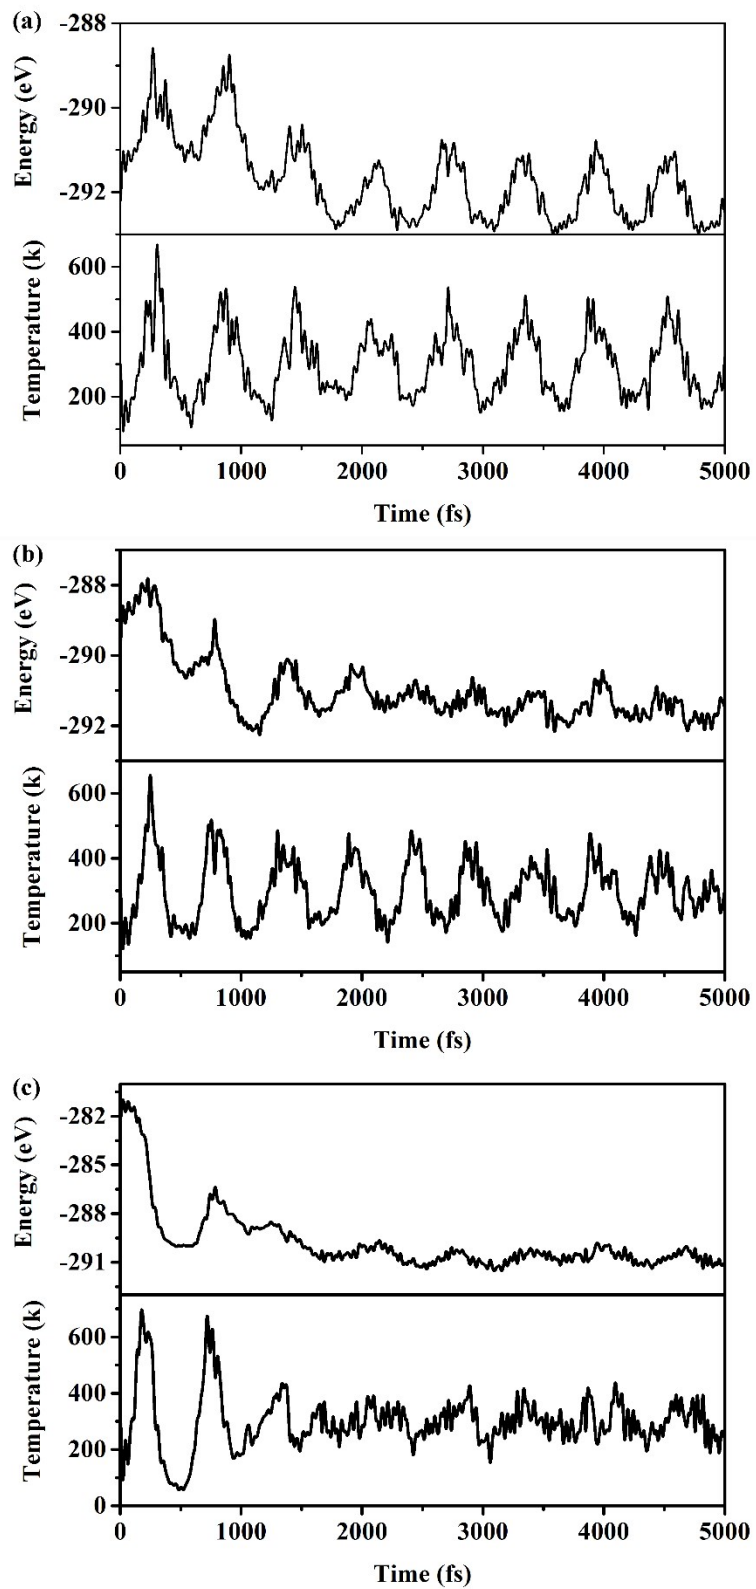

Fig. S3 The variation of free energy and temperature of ideal (a), -4% uniaxial (b) and -6% biaxial (c) strained  $\text{WS}_2/\text{BlueP}$  with simulation time at 300K during a timescale of 5 ps.



#### 4. The effect of uniaxial/biaxial strains on the structural distortion

The relaxed geometrical configurations of uniaxial (-2%, -4%) and biaxial (-2%, -6%, -8%) strained WS<sub>2</sub>/BlueP are depicted in Fig. S4. Compared the strained heterostructures with the ideal constructure, it can be seen that there are only slight changes in the optimized geometrical configurations, indicating the stability of the heterostructures.

To investigate the structural distortions, we have calculated the W-S bond length, WS<sub>2</sub> thickness, P-P bond length, BlueP thickness and the minimum interfacial distance (d) of the heterostructure under the strains. Furthermore, the standard errors of the mean

( $s_{\bar{x}} = \sqrt{\frac{\sum_{i=1}^n (x_i - \bar{x})^2}{n(n-1)}}$ ) for each strained heterostructure is evaluated, where the  $\bar{x}$  is the average value of the ideal heterostructure. The results are shown in Table S6 and S7. The standard errors of the mean of the physical quantities is less than 0.03 and 0.10 for uniaxial and biaxial strained WS<sub>2</sub>/BlueP, respectively, indicating that the structural distortion of the system is very small. In summary, the structural deformations of uniaxial and biaxial strained WS<sub>2</sub>/BlueP given in our manuscript are acceptable.

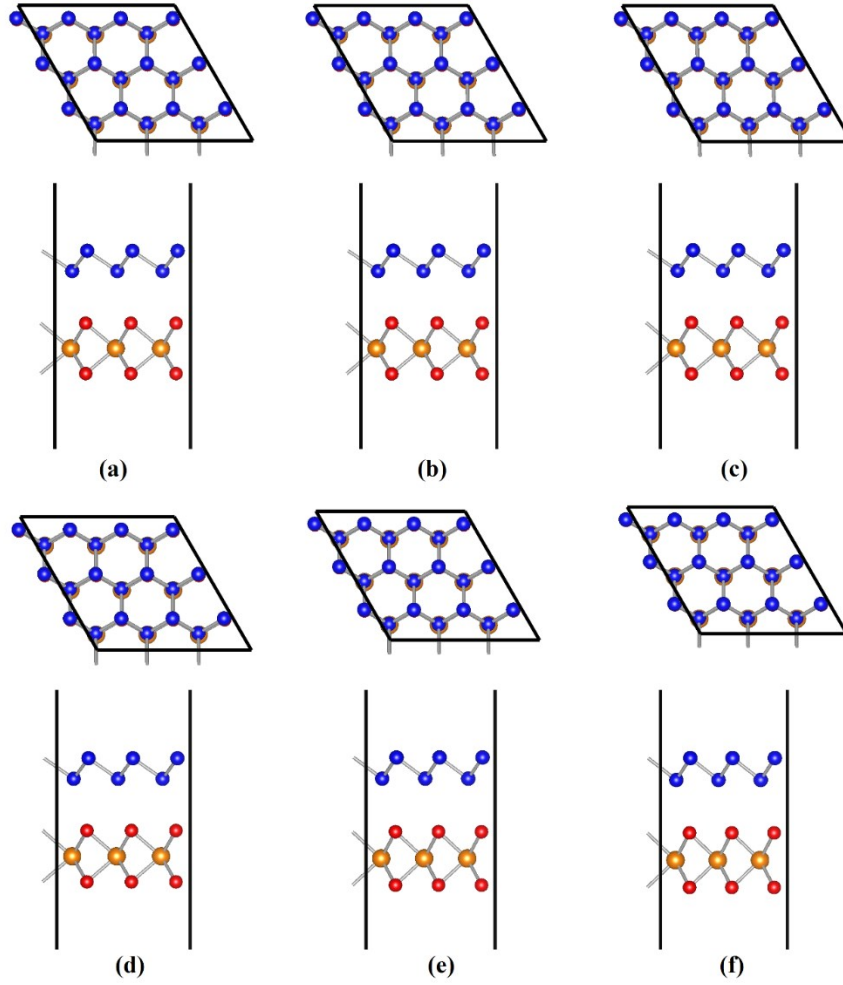

Fig. S4 Optimized geometrical configurations of WS<sub>2</sub>/BlueP heterostructures. (a) ideal, (b) -2% uniaxial strain, (c) -4% uniaxial strain, (d) -2% biaxial strain, (e) -6% biaxial strain, (f) -8% biaxial strain.

Table S6 Geometrical parameters of uniaxial strain WS<sub>2</sub>/BlueP heterostructure.

| physical quantity<br>(Å) | ideal<br>heterostructure | uniaxial strain and standard errors of the mean |                         |             |                         |
|--------------------------|--------------------------|-------------------------------------------------|-------------------------|-------------|-------------------------|
|                          |                          | -2 %                                            | $S_{\bar{x}} (10^{-3})$ | -4 %        | $S_{\bar{x}} (10^{-3})$ |
| W-S length               | 2.432~2.434              | 2.418~2.426                                     | 3.573                   | 2.401~2.438 | 4.586                   |
| WS2 thickness            | 3.124                    | 3.146                                           | 15.556                  | 3.169       | 31.820                  |
| P-P length               | 2.249~2.250              | 2.228~2.247                                     | 4.478                   | 2.208~2.227 | 11.001                  |
| BlueP thickness          | 1.263                    | 1.268                                           | 3.536                   | 1.275       | 8.485                   |
| $d$                      | 3.237                    | 3.206                                           | 21.920                  | 3.192       | 31.820                  |

Table S7 Geometrical parameters of biaxial strain WS<sub>2</sub>/BlueP heterostructure.

| physical quantity<br>(Å) | biaxial strain and standard errors of the mean |                        |             |                        |             |                        |
|--------------------------|------------------------------------------------|------------------------|-------------|------------------------|-------------|------------------------|
|                          | -2 %                                           | $s_{\bar{x}}(10^{-3})$ | -6 %        | $s_{\bar{x}}(10^{-3})$ | -8 %        | $s_{\bar{x}}(10^{-3})$ |
| W-S length               | 2.418~2.421                                    | 6.058                  | 2.397~2.399 | 14.494                 | 2.387~2.390 | 19.907                 |
| WS2 thickness            | 3.169                                          | 31.820                 | 3.271       | 103.945                | 3.324       | 141.421                |
| P-P length               | 2.226~2.227                                    | 13.282                 | 2.182~2.184 | 33.253                 | 2.175~2.176 | 42.725                 |
| BlueP thickness          | 1.275                                          | 8.485                  | 1.307       | 31.113                 | 1.345       | 57.983                 |
| <i>d</i>                 | 3.191                                          | 32.527                 | 3.248       | 7.778                  | 3.225       | 8.485                  |
